# Supplementary material
Source: Springer Nature journal article supplement (https://www.springermedizin.de/resource/supplementary/12887_2014_1129_MOESM4_ESM.pdf/9476592)
Supplement: MOESM4 [file 9476592]

Potentially relevant articles  
identified and screened for  
retrieval  
n = 992

Excluded as abstract  
or title unsuitable  
n = 972

Articles retrieved for more  
detailed evaluation  
n = 20

Studies excluded n = 9  
Norwood procedure n = 5  
Volume, specialization, regionalization n = 4

Studies included in SR  
n = 10 (11 articles)
